# Supplementary material
Source: publisher site journal article supplement (https://www.e-cmh.org/upload/media/cmh-2022-0327-Supplementary-Fig-3.pdf)
Supplement: Supplementary file 1 [file cmh-2022-0327-Supplementary-Fig-3.pdf]

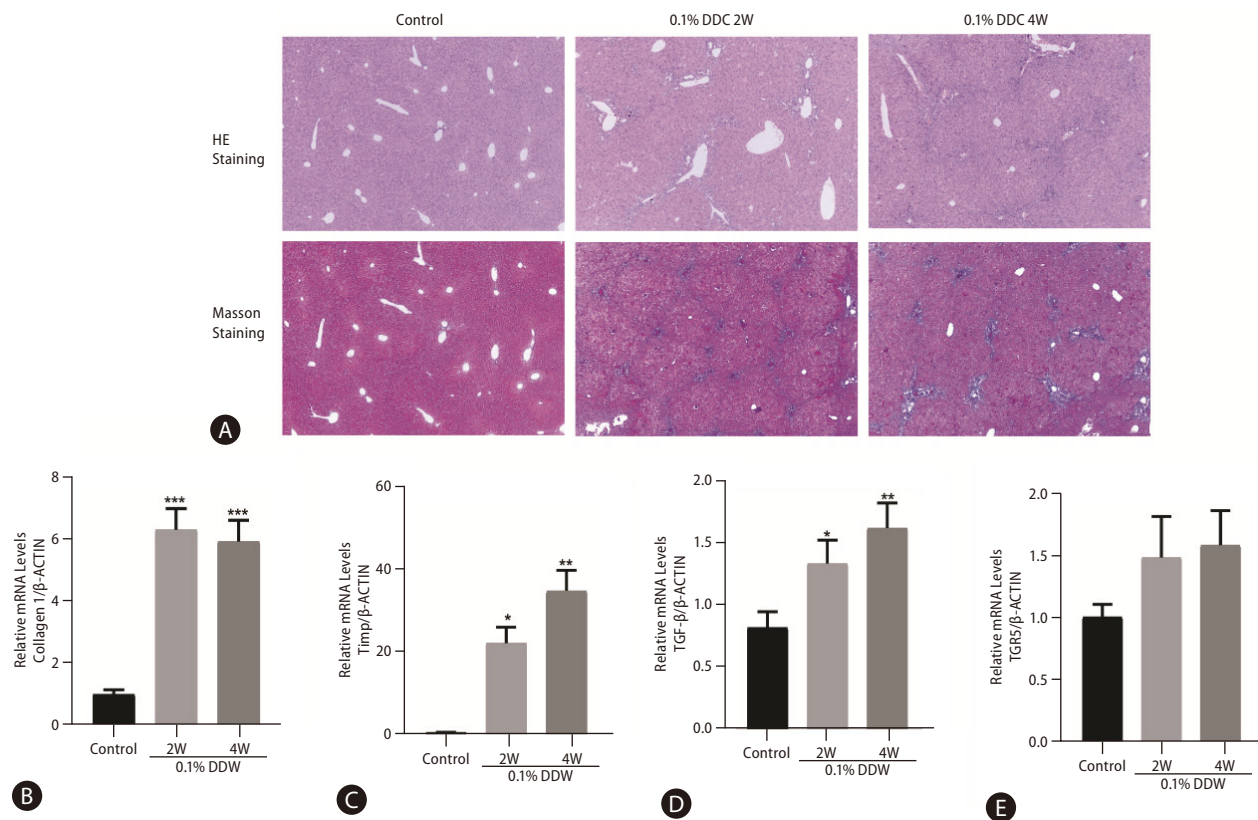

**Supplementary Figure 3.** Cholestatic liver fibrosis mice by feeding of the 0.1% DDC-supplemented diet for 2 weeks, 4 weeks. The representative images of hepatic H&E staining and Masson's trichrome staining (A). Scale bars, 100 μm. RT-PCR of hepatic collagen 1 (B), TIMP-1 (C), TGF-β (D) and TGR5 (E). mRNA levels in liver tissues. Data shown are the mean±SEM. TGR5, GPBAR1; DDC, 3,5-diethoxycarbonyl-1,4-dihydrocolidine. \* $P < 0.05$ , \*\* $P < 0.01$ , \*\*\* $P < 0.005$  compared with the control group.
